# Supplementary material for: A ddPCR platform based on a microfluidic chip with a dual-function flow-focusing structure for sample-to-result DNA quantification analysis
Source: Royal Society of Chemistry journal article supplement (doi:10.1039/d3lc01078c), 2023-12-28
Supplement: d3lc01078c2.stp [file d3lc01078c2.stp]

ISO-10303-21;
HEADER;
/* Generated by software containing ST-Developer
 * from STEP Tools, Inc. (www.steptools.com) 
 */
/* OPTION: using custom schema-name function */

FILE_DESCRIPTION(
/* description */ (''),
/* implementation_level */ '2;1');

FILE_NAME(
/* name */ '\X2\5BCC96C696008F6C5B50\X0\.stp',
/* time_stamp */ '2023-11-15T11:32:51+08:00',
/* author */ (''),
/* organization */ (''),
/* preprocessor_version */ 'ST-DEVELOPER v16',
/* originating_system */ 'SIEMENS PLM Software NX 10.0',
/* authorisation */ '');

FILE_SCHEMA (('AUTOMOTIVE_DESIGN { 1 0 10303 214 3 1 1 1 }'));
ENDSEC;

DATA;
#10=SHAPE_REPRESENTATION_RELATIONSHIP('None',
'relationship between \X2\5BCC96C696008F6C5B50\X0\3-None and \X2\5BCC96C6
96008F6C5B50\X0\3-None',#22,#11);
#11=ADVANCED_BREP_SHAPE_REPRESENTATION('\X2\5BCC96C696008F6C5B50\X0\3-
None',(#32),#803);
#12=SHAPE_DEFINITION_REPRESENTATION(#13,#22);
#13=PRODUCT_DEFINITION_SHAPE('','',#14);
#14=PRODUCT_DEFINITION(' ','',#16,#15);
#15=PRODUCT_DEFINITION_CONTEXT('part definition',#21,'design');
#16=PRODUCT_DEFINITION_FORMATION_WITH_SPECIFIED_SOURCE(' ',' ',#18,
 .NOT_KNOWN.);
#17=PRODUCT_RELATED_PRODUCT_CATEGORY('part','',(#18));
#18=PRODUCT('\X2\5BCC96C696008F6C5B50\X0\3','\X2\5BCC96C696008F6C5B50\X0\3',
' ',(#19));
#19=PRODUCT_CONTEXT(' ',#21,'mechanical');
#20=APPLICATION_PROTOCOL_DEFINITION('international standard',
'automotive_design',2010,#21);
#21=APPLICATION_CONTEXT(
'core data for automotive mechanical design processes');
#22=SHAPE_REPRESENTATION('\X2\5BCC96C696008F6C5B50\X0\3-None',(#462),#803);
#23=PRESENTATION_LAYER_ASSIGNMENT('1','Layer 1',(#32));
#24=STYLED_ITEM('',(#25),#32);
#25=PRESENTATION_STYLE_ASSIGNMENT((#26));
#26=SURFACE_STYLE_USAGE(.BOTH.,#27);
#27=SURFACE_SIDE_STYLE('',(#28));
#28=SURFACE_STYLE_FILL_AREA(#29);
#29=FILL_AREA_STYLE('',(#30));
#30=FILL_AREA_STYLE_COLOUR('',#31);
#31=COLOUR_RGB('Orange',1.,0.6,0.);
#32=MANIFOLD_SOLID_BREP('',#33);
#33=CLOSED_SHELL('',(#69,#70,#71,#72,#73,#74,#75,#76,#77,#78,#79,#80,#81,
#82,#83,#84,#85,#86,#87,#88,#89,#90,#91,#92,#93,#94,#95));
#34=CONICAL_SURFACE('',#494,4.4,45.);
#35=CONICAL_SURFACE('',#495,4.5,45.0000000000001);
#36=FACE_OUTER_BOUND('',#202,.T.);
#37=FACE_OUTER_BOUND('',#203,.T.);
#38=FACE_OUTER_BOUND('',#204,.T.);
#39=FACE_OUTER_BOUND('',#205,.T.);
#40=FACE_OUTER_BOUND('',#206,.T.);
#41=FACE_OUTER_BOUND('',#207,.T.);
#42=FACE_OUTER_BOUND('',#208,.T.);
#43=FACE_OUTER_BOUND('',#213,.T.);
#44=FACE_OUTER_BOUND('',#214,.T.);
#45=FACE_OUTER_BOUND('',#215,.T.);
#46=FACE_OUTER_BOUND('',#216,.T.);
#47=FACE_OUTER_BOUND('',#217,.T.);
#48=FACE_OUTER_BOUND('',#221,.T.);
#49=FACE_OUTER_BOUND('',#222,.T.);
#50=FACE_OUTER_BOUND('',#223,.T.);
#51=FACE_OUTER_BOUND('',#224,.T.);
#52=FACE_OUTER_BOUND('',#225,.T.);
#53=FACE_OUTER_BOUND('',#226,.T.);
#54=FACE_OUTER_BOUND('',#227,.T.);
#55=FACE_OUTER_BOUND('',#228,.T.);
#56=ELLIPSE('',#471,0.556300970237593,0.499999999999998);
#57=ELLIPSE('',#496,0.556300970237593,0.499999999999998);
#58=CYLINDRICAL_SURFACE('',#470,1.5);
#59=CYLINDRICAL_SURFACE('',#481,4.5);
#60=CYLINDRICAL_SURFACE('',#487,0.499999999999995);
#61=CYLINDRICAL_SURFACE('',#488,0.5);
#62=CYLINDRICAL_SURFACE('',#490,0.5);
#63=CYLINDRICAL_SURFACE('',#503,0.499999999999998);
#64=CYLINDRICAL_SURFACE('',#505,1.5);
#65=CYLINDRICAL_SURFACE('',#506,0.9);
#66=CYLINDRICAL_SURFACE('',#512,0.6);
#67=CYLINDRICAL_SURFACE('',#513,0.6);
#68=B_SPLINE_CURVE_WITH_KNOTS('',3,(#670,#671,#672,#673,#674,#675,#676,
#677,#678,#679,#680,#681,#682,#683,#684,#685,#686,#687,#688,#689,#690,#691,
#692,#693,#694,#695,#696,#697),.UNSPECIFIED.,.F.,.F.,(4,3,3,3,3,3,3,3,3,
4),(0.,0.265869436834847,0.39945963961865,0.446882483866817,0.495064981509445,
0.538101825741219,0.59002742039607,0.677757189788391,0.920583201173894,
1.),.UNSPECIFIED.);
#69=ADVANCED_FACE('',(#175,#176),#96,.F.);
#70=ADVANCED_FACE('',(#177,#178),#58,.F.);
#71=ADVANCED_FACE('',(#179,#180,#181,#182),#97,.T.);
#72=ADVANCED_FACE('',(#183,#184),#59,.T.);
#73=ADVANCED_FACE('',(#36),#98,.F.);
#74=ADVANCED_FACE('',(#37),#99,.F.);
#75=ADVANCED_FACE('',(#38),#100,.T.);
#76=ADVANCED_FACE('',(#39),#60,.F.);
#77=ADVANCED_FACE('',(#40),#61,.F.);
#78=ADVANCED_FACE('',(#41),#62,.F.);
#79=ADVANCED_FACE('',(#42),#101,.T.);
#80=ADVANCED_FACE('',(#185,#186),#34,.T.);
#81=ADVANCED_FACE('',(#187,#188),#35,.T.);
#82=ADVANCED_FACE('',(#43),#102,.F.);
#83=ADVANCED_FACE('',(#44),#103,.F.);
#84=ADVANCED_FACE('',(#45),#104,.T.);
#85=ADVANCED_FACE('',(#46),#105,.F.);
#86=ADVANCED_FACE('',(#47),#106,.T.);
#87=ADVANCED_FACE('',(#189,#190,#191),#63,.F.);
#88=ADVANCED_FACE('',(#48),#107,.T.);
#89=ADVANCED_FACE('',(#49),#64,.F.);
#90=ADVANCED_FACE('',(#50),#65,.T.);
#91=ADVANCED_FACE('',(#51),#108,.F.);
#92=ADVANCED_FACE('',(#52),#109,.F.);
#93=ADVANCED_FACE('',(#53),#110,.T.);
#94=ADVANCED_FACE('',(#54),#66,.F.);
#95=ADVANCED_FACE('',(#55),#67,.F.);
#96=PLANE('',#466);
#97=PLANE('',#478);
#98=PLANE('',#482);
#99=PLANE('',#483);
#100=PLANE('',#486);
#101=PLANE('',#493);
#102=PLANE('',#497);
#103=PLANE('',#498);
#104=PLANE('',#499);
#105=PLANE('',#500);
#106=PLANE('',#501);
#107=PLANE('',#504);
#108=PLANE('',#507);
#109=PLANE('',#508);
#110=PLANE('',#511);
#111=LINE('',#656,#143);
#112=LINE('',#660,#144);
#113=LINE('',#665,#145);
#114=LINE('',#669,#146);
#115=LINE('',#709,#147);
#116=LINE('',#713,#148);
#117=LINE('',#714,#149);
#118=LINE('',#718,#150);
#119=LINE('',#722,#151);
#120=LINE('',#726,#152);
#121=LINE('',#733,#153);
#122=LINE('',#735,#154);
#123=LINE('',#737,#155);
#124=LINE('',#739,#156);
#125=LINE('',#741,#157);
#126=LINE('',#743,#158);
#127=LINE('',#753,#159);
#128=LINE('',#754,#160);
#129=LINE('',#756,#161);
#130=LINE('',#760,#162);
#131=LINE('',#761,#163);
#132=LINE('',#765,#164);
#133=LINE('',#771,#165);
#134=LINE('',#773,#166);
#135=LINE('',#775,#167);
#136=LINE('',#777,#168);
#137=LINE('',#785,#169);
#138=LINE('',#787,#170);
#139=LINE('',#789,#171);
#140=LINE('',#791,#172);
#141=LINE('',#794,#173);
#142=LINE('',#795,#174);
#143=VECTOR('',#520,1.);
#144=VECTOR('',#523,1.);
#145=VECTOR('',#528,1.);
#146=VECTOR('',#531,1.);
#147=VECTOR('',#542,1.);
#148=VECTOR('',#545,1.);
#149=VECTOR('',#546,1.);
#150=VECTOR('',#549,1.);
#151=VECTOR('',#552,1.);
#152=VECTOR('',#555,1.);
#153=VECTOR('',#564,1.);
#154=VECTOR('',#565,1.);
#155=VECTOR('',#566,1.);
#156=VECTOR('',#569,1.);
#157=VECTOR('',#570,1.);
#158=VECTOR('',#571,1.);
#159=VECTOR('',#586,1.);
#160=VECTOR('',#587,1.);
#161=VECTOR('',#590,1.);
#162=VECTOR('',#593,1.);
#163=VECTOR('',#594,1.);
#164=VECTOR('',#597,1.);
#165=VECTOR('',#608,1.);
#166=VECTOR('',#611,1.);
#167=VECTOR('',#614,1.);
#168=VECTOR('',#617,1.);
#169=VECTOR('',#630,1.);
#170=VECTOR('',#631,1.);
#171=VECTOR('',#632,1.);
#172=VECTOR('',#635,1.);
#173=VECTOR('',#636,1.);
#174=VECTOR('',#637,1.);
#175=FACE_BOUND('',#192,.T.);
#176=FACE_BOUND('',#193,.T.);
#177=FACE_BOUND('',#194,.T.);
#178=FACE_BOUND('',#195,.T.);
#179=FACE_BOUND('',#196,.T.);
#180=FACE_BOUND('',#197,.T.);
#181=FACE_BOUND('',#198,.T.);
#182=FACE_BOUND('',#199,.T.);
#183=FACE_BOUND('',#200,.T.);
#184=FACE_BOUND('',#201,.T.);
#185=FACE_BOUND('',#209,.T.);
#186=FACE_BOUND('',#210,.T.);
#187=FACE_BOUND('',#211,.T.);
#188=FACE_BOUND('',#212,.T.);
#189=FACE_BOUND('',#218,.T.);
#190=FACE_BOUND('',#219,.T.);
#191=FACE_BOUND('',#220,.T.);
#192=EDGE_LOOP('',(#229));
#193=EDGE_LOOP('',(#230,#231,#232,#233));
#194=EDGE_LOOP('',(#234,#235,#236,#237));
#195=EDGE_LOOP('',(#238,#239));
#196=EDGE_LOOP('',(#240));
#197=EDGE_LOOP('',(#241));
#198=EDGE_LOOP('',(#242,#243,#244,#245));
#199=EDGE_LOOP('',(#246,#247,#248,#249,#250,#251,#252,#253));
#200=EDGE_LOOP('',(#254));
#201=EDGE_LOOP('',(#255));
#202=EDGE_LOOP('',(#256,#257,#258,#259));
#203=EDGE_LOOP('',(#260,#261,#262,#263));
#204=EDGE_LOOP('',(#264,#265,#266,#267));
#205=EDGE_LOOP('',(#268,#269,#270,#271));
#206=EDGE_LOOP('',(#272,#273,#274,#275));
#207=EDGE_LOOP('',(#276,#277,#278,#279));
#208=EDGE_LOOP('',(#280,#281,#282,#283,#284,#285,#286,#287));
#209=EDGE_LOOP('',(#288));
#210=EDGE_LOOP('',(#289));
#211=EDGE_LOOP('',(#290));
#212=EDGE_LOOP('',(#291));
#213=EDGE_LOOP('',(#292,#293));
#214=EDGE_LOOP('',(#294,#295,#296,#297));
#215=EDGE_LOOP('',(#298,#299,#300,#301));
#216=EDGE_LOOP('',(#302,#303,#304,#305));
#217=EDGE_LOOP('',(#306,#307,#308,#309));
#218=EDGE_LOOP('',(#310));
#219=EDGE_LOOP('',(#311));
#220=EDGE_LOOP('',(#312,#313));
#221=EDGE_LOOP('',(#314));
#222=EDGE_LOOP('',(#315,#316,#317,#318));
#223=EDGE_LOOP('',(#319,#320,#321,#322));
#224=EDGE_LOOP('',(#323,#324,#325,#326));
#225=EDGE_LOOP('',(#327,#328,#329,#330));
#226=EDGE_LOOP('',(#331,#332,#333,#334));
#227=EDGE_LOOP('',(#335,#336,#337,#338));
#228=EDGE_LOOP('',(#339,#340,#341,#342));
#229=ORIENTED_EDGE('',*,*,#383,.T.);
#230=ORIENTED_EDGE('',*,*,#384,.T.);
#231=ORIENTED_EDGE('',*,*,#385,.F.);
#232=ORIENTED_EDGE('',*,*,#386,.T.);
#233=ORIENTED_EDGE('',*,*,#387,.F.);
#234=ORIENTED_EDGE('',*,*,#388,.F.);
#235=ORIENTED_EDGE('',*,*,#389,.T.);
#236=ORIENTED_EDGE('',*,*,#390,.T.);
#237=ORIENTED_EDGE('',*,*,#391,.F.);
#238=ORIENTED_EDGE('',*,*,#392,.F.);
#239=ORIENTED_EDGE('',*,*,#393,.F.);
#240=ORIENTED_EDGE('',*,*,#394,.T.);
#241=ORIENTED_EDGE('',*,*,#395,.T.);
#242=ORIENTED_EDGE('',*,*,#396,.F.);
#243=ORIENTED_EDGE('',*,*,#397,.F.);
#244=ORIENTED_EDGE('',*,*,#398,.F.);
#245=ORIENTED_EDGE('',*,*,#399,.F.);
#246=ORIENTED_EDGE('',*,*,#400,.F.);
#247=ORIENTED_EDGE('',*,*,#401,.T.);
#248=ORIENTED_EDGE('',*,*,#402,.F.);
#249=ORIENTED_EDGE('',*,*,#403,.F.);
#250=ORIENTED_EDGE('',*,*,#404,.T.);
#251=ORIENTED_EDGE('',*,*,#405,.T.);
#252=ORIENTED_EDGE('',*,*,#406,.T.);
#253=ORIENTED_EDGE('',*,*,#388,.T.);
#254=ORIENTED_EDGE('',*,*,#407,.T.);
#255=ORIENTED_EDGE('',*,*,#408,.T.);
#256=ORIENTED_EDGE('',*,*,#399,.T.);
#257=ORIENTED_EDGE('',*,*,#409,.T.);
#258=ORIENTED_EDGE('',*,*,#410,.T.);
#259=ORIENTED_EDGE('',*,*,#411,.F.);
#260=ORIENTED_EDGE('',*,*,#397,.T.);
#261=ORIENTED_EDGE('',*,*,#412,.T.);
#262=ORIENTED_EDGE('',*,*,#413,.T.);
#263=ORIENTED_EDGE('',*,*,#414,.F.);
#264=ORIENTED_EDGE('',*,*,#413,.F.);
#265=ORIENTED_EDGE('',*,*,#415,.T.);
#266=ORIENTED_EDGE('',*,*,#410,.F.);
#267=ORIENTED_EDGE('',*,*,#416,.T.);
#268=ORIENTED_EDGE('',*,*,#398,.T.);
#269=ORIENTED_EDGE('',*,*,#414,.T.);
#270=ORIENTED_EDGE('',*,*,#416,.F.);
#271=ORIENTED_EDGE('',*,*,#409,.F.);
#272=ORIENTED_EDGE('',*,*,#396,.T.);
#273=ORIENTED_EDGE('',*,*,#411,.T.);
#274=ORIENTED_EDGE('',*,*,#415,.F.);
#275=ORIENTED_EDGE('',*,*,#412,.F.);
#276=ORIENTED_EDGE('',*,*,#417,.T.);
#277=ORIENTED_EDGE('',*,*,#418,.T.);
#278=ORIENTED_EDGE('',*,*,#403,.T.);
#279=ORIENTED_EDGE('',*,*,#419,.F.);
#280=ORIENTED_EDGE('',*,*,#420,.F.);
#281=ORIENTED_EDGE('',*,*,#421,.T.);
#282=ORIENTED_EDGE('',*,*,#422,.F.);
#283=ORIENTED_EDGE('',*,*,#417,.F.);
#284=ORIENTED_EDGE('',*,*,#423,.T.);
#285=ORIENTED_EDGE('',*,*,#424,.T.);
#286=ORIENTED_EDGE('',*,*,#425,.T.);
#287=ORIENTED_EDGE('',*,*,#390,.F.);
#288=ORIENTED_EDGE('',*,*,#408,.F.);
#289=ORIENTED_EDGE('',*,*,#395,.F.);
#290=ORIENTED_EDGE('',*,*,#383,.F.);
#291=ORIENTED_EDGE('',*,*,#407,.F.);
#292=ORIENTED_EDGE('',*,*,#426,.F.);
#293=ORIENTED_EDGE('',*,*,#393,.T.);
#294=ORIENTED_EDGE('',*,*,#422,.T.);
#295=ORIENTED_EDGE('',*,*,#427,.T.);
#296=ORIENTED_EDGE('',*,*,#404,.F.);
#297=ORIENTED_EDGE('',*,*,#418,.F.);
#298=ORIENTED_EDGE('',*,*,#402,.T.);
#299=ORIENTED_EDGE('',*,*,#428,.T.);
#300=ORIENTED_EDGE('',*,*,#423,.F.);
#301=ORIENTED_EDGE('',*,*,#419,.T.);
#302=ORIENTED_EDGE('',*,*,#406,.F.);
#303=ORIENTED_EDGE('',*,*,#429,.T.);
#304=ORIENTED_EDGE('',*,*,#420,.T.);
#305=ORIENTED_EDGE('',*,*,#389,.F.);
#306=ORIENTED_EDGE('',*,*,#425,.F.);
#307=ORIENTED_EDGE('',*,*,#430,.T.);
#308=ORIENTED_EDGE('',*,*,#400,.T.);
#309=ORIENTED_EDGE('',*,*,#391,.T.);
#310=ORIENTED_EDGE('',*,*,#394,.F.);
#311=ORIENTED_EDGE('',*,*,#431,.F.);
#312=ORIENTED_EDGE('',*,*,#426,.T.);
#313=ORIENTED_EDGE('',*,*,#392,.T.);
#314=ORIENTED_EDGE('',*,*,#431,.T.);
#315=ORIENTED_EDGE('',*,*,#421,.F.);
#316=ORIENTED_EDGE('',*,*,#429,.F.);
#317=ORIENTED_EDGE('',*,*,#405,.F.);
#318=ORIENTED_EDGE('',*,*,#427,.F.);
#319=ORIENTED_EDGE('',*,*,#424,.F.);
#320=ORIENTED_EDGE('',*,*,#428,.F.);
#321=ORIENTED_EDGE('',*,*,#401,.F.);
#322=ORIENTED_EDGE('',*,*,#430,.F.);
#323=ORIENTED_EDGE('',*,*,#387,.T.);
#324=ORIENTED_EDGE('',*,*,#432,.T.);
#325=ORIENTED_EDGE('',*,*,#433,.T.);
#326=ORIENTED_EDGE('',*,*,#434,.T.);
#327=ORIENTED_EDGE('',*,*,#435,.T.);
#328=ORIENTED_EDGE('',*,*,#436,.T.);
#329=ORIENTED_EDGE('',*,*,#385,.T.);
#330=ORIENTED_EDGE('',*,*,#437,.T.);
#331=ORIENTED_EDGE('',*,*,#433,.F.);
#332=ORIENTED_EDGE('',*,*,#438,.T.);
#333=ORIENTED_EDGE('',*,*,#435,.F.);
#334=ORIENTED_EDGE('',*,*,#439,.T.);
#335=ORIENTED_EDGE('',*,*,#438,.F.);
#336=ORIENTED_EDGE('',*,*,#432,.F.);
#337=ORIENTED_EDGE('',*,*,#386,.F.);
#338=ORIENTED_EDGE('',*,*,#436,.F.);
#339=ORIENTED_EDGE('',*,*,#437,.F.);
#340=ORIENTED_EDGE('',*,*,#384,.F.);
#341=ORIENTED_EDGE('',*,*,#434,.F.);
#342=ORIENTED_EDGE('',*,*,#439,.F.);
#343=VERTEX_POINT('',#652);
#344=VERTEX_POINT('',#654);
#345=VERTEX_POINT('',#655);
#346=VERTEX_POINT('',#657);
#347=VERTEX_POINT('',#659);
#348=VERTEX_POINT('',#663);
#349=VERTEX_POINT('',#664);
#350=VERTEX_POINT('',#666);
#351=VERTEX_POINT('',#668);
#352=VERTEX_POINT('',#698);
#353=VERTEX_POINT('',#699);
#354=VERTEX_POINT('',#703);
#355=VERTEX_POINT('',#705);
#356=VERTEX_POINT('',#707);
#357=VERTEX_POINT('',#708);
#358=VERTEX_POINT('',#710);
#359=VERTEX_POINT('',#712);
#360=VERTEX_POINT('',#715);
#361=VERTEX_POINT('',#717);
#362=VERTEX_POINT('',#719);
#363=VERTEX_POINT('',#721);
#364=VERTEX_POINT('',#723);
#365=VERTEX_POINT('',#725);
#366=VERTEX_POINT('',#729);
#367=VERTEX_POINT('',#731);
#368=VERTEX_POINT('',#734);
#369=VERTEX_POINT('',#736);
#370=VERTEX_POINT('',#740);
#371=VERTEX_POINT('',#742);
#372=VERTEX_POINT('',#751);
#373=VERTEX_POINT('',#752);
#374=VERTEX_POINT('',#757);
#375=VERTEX_POINT('',#759);
#376=VERTEX_POINT('',#762);
#377=VERTEX_POINT('',#764);
#378=VERTEX_POINT('',#780);
#379=VERTEX_POINT('',#786);
#380=VERTEX_POINT('',#788);
#381=VERTEX_POINT('',#792);
#382=VERTEX_POINT('',#793);
#383=EDGE_CURVE('',#343,#343,#440,.T.);
#384=EDGE_CURVE('',#344,#345,#441,.T.);
#385=EDGE_CURVE('',#346,#345,#111,.T.);
#386=EDGE_CURVE('',#346,#347,#442,.T.);
#387=EDGE_CURVE('',#344,#347,#112,.T.);
#388=EDGE_CURVE('',#348,#349,#443,.T.);
#389=EDGE_CURVE('',#348,#350,#113,.T.);
#390=EDGE_CURVE('',#350,#351,#444,.T.);
#391=EDGE_CURVE('',#349,#351,#114,.T.);
#392=EDGE_CURVE('',#352,#353,#68,.T.);
#393=EDGE_CURVE('',#353,#352,#445,.T.);
#394=EDGE_CURVE('',#354,#354,#56,.T.);
#395=EDGE_CURVE('',#355,#355,#446,.T.);
#396=EDGE_CURVE('',#356,#357,#447,.T.);
#397=EDGE_CURVE('',#358,#356,#115,.T.);
#398=EDGE_CURVE('',#359,#358,#448,.T.);
#399=EDGE_CURVE('',#357,#359,#116,.T.);
#400=EDGE_CURVE('',#360,#349,#117,.T.);
#401=EDGE_CURVE('',#360,#361,#449,.T.);
#402=EDGE_CURVE('',#362,#361,#118,.T.);
#403=EDGE_CURVE('',#363,#362,#450,.T.);
#404=EDGE_CURVE('',#363,#364,#119,.T.);
#405=EDGE_CURVE('',#364,#365,#451,.T.);
#406=EDGE_CURVE('',#365,#348,#120,.T.);
#407=EDGE_CURVE('',#366,#366,#452,.T.);
#408=EDGE_CURVE('',#367,#367,#453,.T.);
#409=EDGE_CURVE('',#359,#368,#121,.T.);
#410=EDGE_CURVE('',#368,#369,#122,.T.);
#411=EDGE_CURVE('',#357,#369,#123,.T.);
#412=EDGE_CURVE('',#356,#370,#124,.T.);
#413=EDGE_CURVE('',#370,#371,#125,.T.);
#414=EDGE_CURVE('',#358,#371,#126,.T.);
#415=EDGE_CURVE('',#370,#369,#454,.T.);
#416=EDGE_CURVE('',#368,#371,#455,.T.);
#417=EDGE_CURVE('',#372,#373,#456,.T.);
#418=EDGE_CURVE('',#373,#363,#127,.T.);
#419=EDGE_CURVE('',#372,#362,#128,.T.);
#420=EDGE_CURVE('',#374,#350,#129,.T.);
#421=EDGE_CURVE('',#374,#375,#457,.T.);
#422=EDGE_CURVE('',#373,#375,#130,.T.);
#423=EDGE_CURVE('',#372,#376,#131,.T.);
#424=EDGE_CURVE('',#376,#377,#458,.T.);
#425=EDGE_CURVE('',#377,#351,#132,.T.);
#426=EDGE_CURVE('',#353,#352,#57,.T.);
#427=EDGE_CURVE('',#375,#364,#133,.T.);
#428=EDGE_CURVE('',#361,#376,#134,.T.);
#429=EDGE_CURVE('',#365,#374,#135,.T.);
#430=EDGE_CURVE('',#377,#360,#136,.T.);
#431=EDGE_CURVE('',#378,#378,#459,.T.);
#432=EDGE_CURVE('',#347,#379,#137,.T.);
#433=EDGE_CURVE('',#379,#380,#138,.T.);
#434=EDGE_CURVE('',#380,#344,#139,.T.);
#435=EDGE_CURVE('',#381,#382,#140,.T.);
#436=EDGE_CURVE('',#382,#346,#141,.T.);
#437=EDGE_CURVE('',#345,#381,#142,.T.);
#438=EDGE_CURVE('',#379,#382,#460,.T.);
#439=EDGE_CURVE('',#381,#380,#461,.T.);
#440=CIRCLE('',#463,4.4);
#441=CIRCLE('',#464,0.6);
#442=CIRCLE('',#465,0.6);
#443=CIRCLE('',#467,1.5);
#444=CIRCLE('',#468,1.5);
#445=CIRCLE('',#469,1.5);
#446=CIRCLE('',#472,4.4);
#447=CIRCLE('',#473,0.5);
#448=CIRCLE('',#474,0.499999999999995);
#449=CIRCLE('',#475,0.9);
#450=CIRCLE('',#476,0.5);
#451=CIRCLE('',#477,1.5);
#452=CIRCLE('',#479,4.5);
#453=CIRCLE('',#480,4.5);
#454=CIRCLE('',#484,0.5);
#455=CIRCLE('',#485,0.499999999999995);
#456=CIRCLE('',#489,0.5);
#457=CIRCLE('',#491,1.5);
#458=CIRCLE('',#492,0.9);
#459=CIRCLE('',#502,0.5);
#460=CIRCLE('',#509,0.6);
#461=CIRCLE('',#510,0.6);
#462=AXIS2_PLACEMENT_3D('',#650,#514,#515);
#463=AXIS2_PLACEMENT_3D('',#651,#516,#517);
#464=AXIS2_PLACEMENT_3D('',#653,#518,#519);
#465=AXIS2_PLACEMENT_3D('',#658,#521,#522);
#466=AXIS2_PLACEMENT_3D('',#661,#524,#525);
#467=AXIS2_PLACEMENT_3D('',#662,#526,#527);
#468=AXIS2_PLACEMENT_3D('',#667,#529,#530);
#469=AXIS2_PLACEMENT_3D('',#700,#532,#533);
#470=AXIS2_PLACEMENT_3D('',#701,#534,#535);
#471=AXIS2_PLACEMENT_3D('',#702,#536,#537);
#472=AXIS2_PLACEMENT_3D('',#704,#538,#539);
#473=AXIS2_PLACEMENT_3D('',#706,#540,#541);
#474=AXIS2_PLACEMENT_3D('',#711,#543,#544);
#475=AXIS2_PLACEMENT_3D('',#716,#547,#548);
#476=AXIS2_PLACEMENT_3D('',#720,#550,#551);
#477=AXIS2_PLACEMENT_3D('',#724,#553,#554);
#478=AXIS2_PLACEMENT_3D('',#727,#556,#557);
#479=AXIS2_PLACEMENT_3D('',#728,#558,#559);
#480=AXIS2_PLACEMENT_3D('',#730,#560,#561);
#481=AXIS2_PLACEMENT_3D('',#732,#562,#563);
#482=AXIS2_PLACEMENT_3D('',#738,#567,#568);
#483=AXIS2_PLACEMENT_3D('',#744,#572,#573);
#484=AXIS2_PLACEMENT_3D('',#745,#574,#575);
#485=AXIS2_PLACEMENT_3D('',#746,#576,#577);
#486=AXIS2_PLACEMENT_3D('',#747,#578,#579);
#487=AXIS2_PLACEMENT_3D('',#748,#580,#581);
#488=AXIS2_PLACEMENT_3D('',#749,#582,#583);
#489=AXIS2_PLACEMENT_3D('',#750,#584,#585);
#490=AXIS2_PLACEMENT_3D('',#755,#588,#589);
#491=AXIS2_PLACEMENT_3D('',#758,#591,#592);
#492=AXIS2_PLACEMENT_3D('',#763,#595,#596);
#493=AXIS2_PLACEMENT_3D('',#766,#598,#599);
#494=AXIS2_PLACEMENT_3D('',#767,#600,#601);
#495=AXIS2_PLACEMENT_3D('',#768,#602,#603);
#496=AXIS2_PLACEMENT_3D('',#769,#604,#605);
#497=AXIS2_PLACEMENT_3D('',#770,#606,#607);
#498=AXIS2_PLACEMENT_3D('',#772,#609,#610);
#499=AXIS2_PLACEMENT_3D('',#774,#612,#613);
#500=AXIS2_PLACEMENT_3D('',#776,#615,#616);
#501=AXIS2_PLACEMENT_3D('',#778,#618,#619);
#502=AXIS2_PLACEMENT_3D('',#779,#620,#621);
#503=AXIS2_PLACEMENT_3D('',#781,#622,#623);
#504=AXIS2_PLACEMENT_3D('',#782,#624,#625);
#505=AXIS2_PLACEMENT_3D('',#783,#626,#627);
#506=AXIS2_PLACEMENT_3D('',#784,#628,#629);
#507=AXIS2_PLACEMENT_3D('',#790,#633,#634);
#508=AXIS2_PLACEMENT_3D('',#796,#638,#639);
#509=AXIS2_PLACEMENT_3D('',#797,#640,#641);
#510=AXIS2_PLACEMENT_3D('',#798,#642,#643);
#511=AXIS2_PLACEMENT_3D('',#799,#644,#645);
#512=AXIS2_PLACEMENT_3D('',#800,#646,#647);
#513=AXIS2_PLACEMENT_3D('',#801,#648,#649);
#514=DIRECTION('',(0.,0.,1.));
#515=DIRECTION('',(1.,0.,0.));
#516=DIRECTION('',(-1.,0.,0.));
#517=DIRECTION('',(0.,0.,-1.));
#518=DIRECTION('',(1.,0.,0.));
#519=DIRECTION('',(0.,0.,-1.));
#520=DIRECTION('',(0.,8.34001671142696E-17,-1.));
#521=DIRECTION('',(1.,0.,0.));
#522=DIRECTION('',(0.,0.,-1.));
#523=DIRECTION('',(0.,0.,1.));
#524=DIRECTION('',(1.,0.,0.));
#525=DIRECTION('',(0.,0.,-1.));
#526=DIRECTION('',(-1.,0.,0.));
#527=DIRECTION('',(0.,0.,1.));
#528=DIRECTION('',(-1.,0.,0.));
#529=DIRECTION('',(1.,0.,0.));
#530=DIRECTION('',(0.,0.,-1.));
#531=DIRECTION('',(-1.,0.,0.));
#532=DIRECTION('',(1.,0.,0.));
#533=DIRECTION('',(0.,0.,1.));
#534=DIRECTION('',(-1.,0.,0.));
#535=DIRECTION('',(0.,0.,1.));
#536=DIRECTION('',(-1.,0.,0.));
#537=DIRECTION('',(0.,-0.177865599292836,-0.984054789423943));
#538=DIRECTION('',(1.,0.,0.));
#539=DIRECTION('',(0.,0.,-1.));
#540=DIRECTION('',(1.,0.,0.));
#541=DIRECTION('',(0.,1.,-6.12323399573677E-17));
#542=DIRECTION('',(0.,-0.866025403784437,0.500000000000002));
#543=DIRECTION('',(1.,0.,0.));
#544=DIRECTION('',(0.,1.,0.));
#545=DIRECTION('',(0.,0.866025403784437,-0.500000000000002));
#546=DIRECTION('',(0.,-0.673956520977753,-0.738771011769928));
#547=DIRECTION('',(1.,0.,0.));
#548=DIRECTION('',(0.,0.,-1.));
#549=DIRECTION('',(0.,1.11022302462516E-16,-1.));
#550=DIRECTION('',(1.,0.,0.));
#551=DIRECTION('',(0.,1.,0.));
#552=DIRECTION('',(0.,1.11022302462516E-16,-1.));
#553=DIRECTION('',(-1.,0.,0.));
#554=DIRECTION('',(0.,0.,-1.));
#555=DIRECTION('',(0.,-0.673956520977753,-0.738771011769928));
#556=DIRECTION('',(1.,0.,0.));
#557=DIRECTION('',(0.,0.,-1.));
#558=DIRECTION('',(1.,0.,0.));
#559=DIRECTION('',(0.,0.,-1.));
#560=DIRECTION('',(-1.,0.,0.));
#561=DIRECTION('',(0.,0.,-1.));
#562=DIRECTION('',(-1.,0.,0.));
#563=DIRECTION('',(0.,0.,1.));
#564=DIRECTION('',(-1.,0.,0.));
#565=DIRECTION('',(0.,-0.866025403784437,0.500000000000002));
#566=DIRECTION('',(-1.,0.,0.));
#567=DIRECTION('',(0.,-0.500000000000002,-0.866025403784437));
#568=DIRECTION('',(0.,0.866025403784437,-0.500000000000002));
#569=DIRECTION('',(-1.,0.,0.));
#570=DIRECTION('',(0.,0.866025403784437,-0.500000000000002));
#571=DIRECTION('',(-1.,0.,0.));
#572=DIRECTION('',(0.,0.500000000000002,0.866025403784437));
#573=DIRECTION('',(0.,-0.866025403784437,0.500000000000002));
#574=DIRECTION('',(1.,0.,0.));
#575=DIRECTION('',(0.,1.,-6.12323399573677E-17));
#576=DIRECTION('',(1.,0.,0.));
#577=DIRECTION('',(0.,1.,0.));
#578=DIRECTION('',(1.,0.,0.));
#579=DIRECTION('',(0.,0.,-1.));
#580=DIRECTION('',(1.,0.,0.));
#581=DIRECTION('',(0.,0.,-1.));
#582=DIRECTION('',(1.,0.,0.));
#583=DIRECTION('',(0.,0.,-1.));
#584=DIRECTION('',(-1.,0.,0.));
#585=DIRECTION('',(0.,1.,0.));
#586=DIRECTION('',(1.,0.,0.));
#587=DIRECTION('',(1.,0.,0.));
#588=DIRECTION('',(1.,0.,0.));
#589=DIRECTION('',(0.,0.,-1.));
#590=DIRECTION('',(0.,-0.673956520977753,-0.738771011769928));
#591=DIRECTION('',(1.,0.,0.));
#592=DIRECTION('',(0.,0.,-1.));
#593=DIRECTION('',(0.,1.11022302462516E-16,-1.));
#594=DIRECTION('',(0.,1.11022302462516E-16,-1.));
#595=DIRECTION('',(-1.,0.,0.));
#596=DIRECTION('',(0.,0.,-1.));
#597=DIRECTION('',(0.,-0.673956520977753,-0.738771011769928));
#598=DIRECTION('',(1.,0.,0.));
#599=DIRECTION('',(0.,0.,-1.));
#600=DIRECTION('',(-1.,0.,0.));
#601=DIRECTION('',(4.31781032451416E-18,0.,1.));
#602=DIRECTION('',(1.,0.,0.));
#603=DIRECTION('',(9.97314890369937E-17,0.,-1.));
#604=DIRECTION('',(1.,0.,0.));
#605=DIRECTION('',(0.,-0.177865599292836,-0.984054789423943));
#606=DIRECTION('',(-1.,0.,0.));
#607=DIRECTION('',(0.,0.,1.));
#608=DIRECTION('',(1.,0.,0.));
#609=DIRECTION('',(0.,1.,1.11022302462516E-16));
#610=DIRECTION('',(0.,-1.11022302462516E-16,1.));
#611=DIRECTION('',(-1.,0.,0.));
#612=DIRECTION('',(0.,1.,1.11022302462516E-16));
#613=DIRECTION('',(0.,-1.11022302462516E-16,1.));
#614=DIRECTION('',(-1.,0.,0.));
#615=DIRECTION('',(0.,0.738771011769928,-0.673956520977753));
#616=DIRECTION('',(0.,0.673956520977753,0.738771011769928));
#617=DIRECTION('',(1.,0.,0.));
#618=DIRECTION('',(0.,0.738771011769928,-0.673956520977753));
#619=DIRECTION('',(0.,0.673956520977753,0.738771011769928));
#620=DIRECTION('',(0.898794046299167,0.0779711467363271,0.431381226543058));
#621=DIRECTION('',(-0.432698527014944,0.,0.901538676219217));
#622=DIRECTION('',(-0.898794046299167,-0.0779711467363271,-0.431381226543058));
#623=DIRECTION('',(-0.432698527014944,0.,0.901538676219218));
#624=DIRECTION('',(0.898794046299167,0.0779711467363271,0.431381226543058));
#625=DIRECTION('',(0.432698527014944,0.,-0.901538676219217));
#626=DIRECTION('',(-1.,0.,0.));
#627=DIRECTION('',(0.,0.,1.));
#628=DIRECTION('',(1.,0.,0.));
#629=DIRECTION('',(0.,0.,-1.));
#630=DIRECTION('',(1.,0.,0.));
#631=DIRECTION('',(0.,0.,-1.));
#632=DIRECTION('',(-1.,0.,0.));
#633=DIRECTION('',(0.,-1.,0.));
#634=DIRECTION('',(0.,0.,-1.));
#635=DIRECTION('',(0.,-8.34001671142696E-17,1.));
#636=DIRECTION('',(-1.,0.,0.));
#637=DIRECTION('',(1.,0.,0.));
#638=DIRECTION('',(0.,1.,8.34001671142696E-17));
#639=DIRECTION('',(0.,-8.33751470641353E-17,1.));
#640=DIRECTION('',(-1.,0.,0.));
#641=DIRECTION('',(0.,0.,1.));
#642=DIRECTION('',(-1.,0.,0.));
#643=DIRECTION('',(0.,0.,1.));
#644=DIRECTION('',(-1.,0.,0.));
#645=DIRECTION('',(0.,0.,1.));
#646=DIRECTION('',(-1.,0.,0.));
#647=DIRECTION('',(0.,0.,1.));
#648=DIRECTION('',(-1.,0.,0.));
#649=DIRECTION('',(0.,0.,1.));
#650=CARTESIAN_POINT('',(0.,0.,0.));
#651=CARTESIAN_POINT('',(0.,0.,0.));
#652=CARTESIAN_POINT('',(0.,0.,-4.4));
#653=CARTESIAN_POINT('',(0.,2.16840434497101E-16,-2.));
#654=CARTESIAN_POINT('',(0.,-0.6,-2.));
#655=CARTESIAN_POINT('',(0.,0.6,-2.));
#656=CARTESIAN_POINT('',(0.,0.6,2.6));
#657=CARTESIAN_POINT('',(0.,0.6,2.));
#658=CARTESIAN_POINT('',(0.,2.16840434497101E-16,2.));
#659=CARTESIAN_POINT('',(0.,-0.6,2.));
#660=CARTESIAN_POINT('',(0.,-0.6,-2.6));
#661=CARTESIAN_POINT('',(0.,0.,0.));
#662=CARTESIAN_POINT('',(5.,-2.41481456572267,-0.647047612756297));
#663=CARTESIAN_POINT('',(5.,-1.23332667566903,0.277120318767297));
#664=CARTESIAN_POINT('',(5.,-1.602712181554,0.614098579256173));
#665=CARTESIAN_POINT('',(5.,-1.23332667566903,0.277120318767297));
#666=CARTESIAN_POINT('',(4.4,-1.23332667566903,0.277120318767297));
#667=CARTESIAN_POINT('',(4.4,-2.41481456572267,-0.647047612756297));
#668=CARTESIAN_POINT('',(4.4,-1.602712181554,0.614098579256173));
#669=CARTESIAN_POINT('',(5.,-1.602712181554,0.614098579256173));
#670=CARTESIAN_POINT('',(1.,-1.76800709187477,0.706333372692553));
#671=CARTESIAN_POINT('',(1.12160849484902,-1.80036384293165,0.721797302390133));
#672=CARTESIAN_POINT('',(1.24250888653636,-1.84131551730228,0.740523006705636));
#673=CARTESIAN_POINT('',(1.35123485379017,-1.90261346327412,0.762792814617926));
#674=CARTESIAN_POINT('',(1.40587141092441,-1.93341667258918,0.773983753297074));
#675=CARTESIAN_POINT('',(1.45904406323526,-1.97022443856013,0.786406270584059));
#676=CARTESIAN_POINT('',(1.49915405397642,-2.01796222870294,0.799502843537942));
#677=CARTESIAN_POINT('',(1.51359329780874,-2.03514741322059,0.804217494595062));
#678=CARTESIAN_POINT('',(1.52635838549193,-2.05406408401916,0.809076331987386));
#679=CARTESIAN_POINT('',(1.53574975167198,-2.07444317733314,0.813824495939665));
#680=CARTESIAN_POINT('',(1.54522770861981,-2.09501017103382,0.81861643916264));
#681=CARTESIAN_POINT('',(1.55131530969467,-2.11770166591755,0.823414424643483));
#682=CARTESIAN_POINT('',(1.55237216972378,-2.1404346479793,0.827644104430431));
#683=CARTESIAN_POINT('',(1.55331872463248,-2.16079497495469,0.831432329979967));
#684=CARTESIAN_POINT('',(1.55024917621652,-2.18169127794455,0.834857648048334));
#685=CARTESIAN_POINT('',(1.54391512311874,-2.20123018374106,0.837668424664173));
#686=CARTESIAN_POINT('',(1.53626924750002,-2.22481572070133,0.841061330922609));
#687=CARTESIAN_POINT('',(1.5238554381237,-2.24714147081543,0.843688776611697));
#688=CARTESIAN_POINT('',(1.50912453730723,-2.26727328425999,0.84567860804387));
#689=CARTESIAN_POINT('',(1.4843059604306,-2.30119130230006,0.849031069986706));
#690=CARTESIAN_POINT('',(1.45251013382749,-2.33027474189534,0.850784382155441));
#691=CARTESIAN_POINT('',(1.41889516821701,-2.3557042725981,0.851787259151455));
#692=CARTESIAN_POINT('',(1.32664022822628,-2.42549461110864,0.854539615294177));
#693=CARTESIAN_POINT('',(1.21785908495771,-2.47310433267283,0.85232031522305));
#694=CARTESIAN_POINT('',(1.10882991279426,-2.51177738101547,0.84981517736539));
#695=CARTESIAN_POINT('',(1.07289914795826,-2.52452215544526,0.848989604562632));
#696=CARTESIAN_POINT('',(1.03657580962535,-2.53618961386003,0.848072595974068));
#697=CARTESIAN_POINT('',(1.00000000000407,-2.5469338348892,0.847122557847176));
#698=CARTESIAN_POINT('',(1.,-1.76800709187477,0.706333372692553));
#699=CARTESIAN_POINT('',(1.,-2.54693383487767,0.847122557846085));
#700=CARTESIAN_POINT('',(1.,-2.41481456572267,-0.647047612756297));
#701=CARTESIAN_POINT('',(5.,-2.41481456572267,-0.647047612756297));
#702=CARTESIAN_POINT('',(5.,-1.75000000000001,3.03108891324553));
#703=CARTESIAN_POINT('',(5.,-1.8489468054585,2.48365827912204));
#704=CARTESIAN_POINT('',(5.,0.,0.));
#705=CARTESIAN_POINT('',(5.,0.,-4.4));
#706=CARTESIAN_POINT('',(5.,0.,0.));
#707=CARTESIAN_POINT('',(5.,0.25000000000001,0.433012701892226));
#708=CARTESIAN_POINT('',(5.,-0.249999999999993,-0.43301270189221));
#709=CARTESIAN_POINT('',(5.,3.28108891324554,-1.31698729810778));
#710=CARTESIAN_POINT('',(5.,3.28108891324554,-1.31698729810778));
#711=CARTESIAN_POINT('',(5.,3.03108891324553,-1.74999999999991));
#712=CARTESIAN_POINT('',(5.,2.78108891324554,-2.18301270189222));
#713=CARTESIAN_POINT('',(5.,-0.249999999999993,-0.43301270189221));
#714=CARTESIAN_POINT('',(5.,-0.184692752942482,2.16848913024444));
#715=CARTESIAN_POINT('',(5.,-0.485106089407064,1.83918500212777));
#716=CARTESIAN_POINT('',(5.,-1.15,2.44574587100775));
#717=CARTESIAN_POINT('',(5.,-0.25,2.44574587100775));
#718=CARTESIAN_POINT('',(5.,-0.25,3.5));
#719=CARTESIAN_POINT('',(5.,-0.25,3.06698729810778));
#720=CARTESIAN_POINT('',(5.,0.,3.5));
#721=CARTESIAN_POINT('',(5.,0.25,3.06698729810778));
#722=CARTESIAN_POINT('',(5.,0.25,3.5));
#723=CARTESIAN_POINT('',(5.,0.25,2.48450638153016));
#724=CARTESIAN_POINT('',(5.,-1.25,2.48450638153016));
#725=CARTESIAN_POINT('',(5.,-0.141843482345107,1.47357160006353));
#726=CARTESIAN_POINT('',(5.,0.184692752942482,1.83151086975556));
#727=CARTESIAN_POINT('',(5.,0.,0.));
#728=CARTESIAN_POINT('',(0.0999999999999998,0.,0.));
#729=CARTESIAN_POINT('',(0.0999999999999998,0.,-4.5));
#730=CARTESIAN_POINT('',(4.9,0.,0.));
#731=CARTESIAN_POINT('',(4.9,0.,-4.5));
#732=CARTESIAN_POINT('',(3.,0.,0.));
#733=CARTESIAN_POINT('',(4.4,2.78108891324554,-2.18301270189222));
#734=CARTESIAN_POINT('',(4.4,2.78108891324554,-2.18301270189222));
#735=CARTESIAN_POINT('',(4.4,-0.249999999999993,-0.43301270189221));
#736=CARTESIAN_POINT('',(4.4,-0.249999999999993,-0.43301270189221));
#737=CARTESIAN_POINT('',(4.4,-0.249999999999993,-0.43301270189221));
#738=CARTESIAN_POINT('',(4.4,-0.249999999999993,-0.43301270189221));
#739=CARTESIAN_POINT('',(4.4,0.25000000000001,0.433012701892226));
#740=CARTESIAN_POINT('',(4.4,0.25000000000001,0.433012701892225));
#741=CARTESIAN_POINT('',(4.4,3.28108891324554,-1.31698729810778));
#742=CARTESIAN_POINT('',(4.4,3.28108891324554,-1.31698729810778));
#743=CARTESIAN_POINT('',(4.4,3.28108891324554,-1.31698729810778));
#744=CARTESIAN_POINT('',(4.4,3.28108891324554,-1.31698729810778));
#745=CARTESIAN_POINT('',(4.4,0.,0.));
#746=CARTESIAN_POINT('',(4.4,3.03108891324553,-1.74999999999991));
#747=CARTESIAN_POINT('',(4.4,0.,0.));
#748=CARTESIAN_POINT('',(4.4,3.03108891324553,-1.74999999999991));
#749=CARTESIAN_POINT('',(4.4,0.,0.));
#750=CARTESIAN_POINT('',(4.4,0.,3.5));
#751=CARTESIAN_POINT('',(4.4,-0.25,3.06698729810778));
#752=CARTESIAN_POINT('',(4.4,0.25,3.06698729810778));
#753=CARTESIAN_POINT('',(4.4,0.25,3.06698729810778));
#754=CARTESIAN_POINT('',(4.4,-0.25,3.06698729810778));
#755=CARTESIAN_POINT('',(4.4,0.,3.5));
#756=CARTESIAN_POINT('',(4.4,0.184692752942482,1.83151086975556));
#757=CARTESIAN_POINT('',(4.4,-0.141843482345107,1.47357160006353));
#758=CARTESIAN_POINT('',(4.4,-1.25,2.48450638153016));
#759=CARTESIAN_POINT('',(4.4,0.25,2.48450638153016));
#760=CARTESIAN_POINT('',(4.4,0.25,3.5));
#761=CARTESIAN_POINT('',(4.4,-0.25,3.5));
#762=CARTESIAN_POINT('',(4.4,-0.25,2.44574587100775));
#763=CARTESIAN_POINT('',(4.4,-1.15,2.44574587100775));
#764=CARTESIAN_POINT('',(4.4,-0.485106089407064,1.83918500212777));
#765=CARTESIAN_POINT('',(4.4,-0.184692752942482,2.16848913024444));
#766=CARTESIAN_POINT('',(4.4,0.,3.5));
#767=CARTESIAN_POINT('',(5.,0.,0.));
#768=CARTESIAN_POINT('',(0.0999999999999998,0.,0.));
#769=CARTESIAN_POINT('',(1.,-2.09700339663966,1.11126655430003));
#770=CARTESIAN_POINT('',(1.,-2.41481456572267,-0.647047612756297));
#771=CARTESIAN_POINT('',(5.,0.25,2.48450638153016));
#772=CARTESIAN_POINT('',(5.,0.25,3.5));
#773=CARTESIAN_POINT('',(5.,-0.25,2.44574587100775));
#774=CARTESIAN_POINT('',(5.,-0.25,3.5));
#775=CARTESIAN_POINT('',(4.4,-0.141843482345107,1.47357160006353));
#776=CARTESIAN_POINT('',(5.,0.184692752942482,1.83151086975556));
#777=CARTESIAN_POINT('',(5.,-0.485106089407064,1.83918500212777));
#778=CARTESIAN_POINT('',(5.,-0.184692752942482,2.16848913024444));
#779=CARTESIAN_POINT('',(0.603557574677721,-2.13139511367938,0.920991796257961));
#780=CARTESIAN_POINT('',(0.38720831117025,-2.13139511367938,1.37176113436757));
#781=CARTESIAN_POINT('',(5.90644244784281,-1.67136534793505,3.466141032862));
#782=CARTESIAN_POINT('',(0.822743148072259,-2.2113273845223,0.478760503274751));
#783=CARTESIAN_POINT('',(5.,-1.25,2.48450638153016));
#784=CARTESIAN_POINT('',(5.,-1.15,2.44574587100775));
#785=CARTESIAN_POINT('',(3.,-0.6,2.));
#786=CARTESIAN_POINT('',(3.,-0.6,2.));
#787=CARTESIAN_POINT('',(3.,-0.6,-2.6));
#788=CARTESIAN_POINT('',(3.,-0.6,-2.));
#789=CARTESIAN_POINT('',(0.,-0.6,-2.));
#790=CARTESIAN_POINT('',(3.,-0.6,-2.6));
#791=CARTESIAN_POINT('',(3.,0.6,2.6));
#792=CARTESIAN_POINT('',(3.,0.6,-2.));
#793=CARTESIAN_POINT('',(3.,0.6,2.));
#794=CARTESIAN_POINT('',(0.,0.6,2.));
#795=CARTESIAN_POINT('',(3.,0.6,-2.));
#796=CARTESIAN_POINT('',(3.,0.6,2.6));
#797=CARTESIAN_POINT('',(3.,-2.16840434497101E-16,2.));
#798=CARTESIAN_POINT('',(3.,1.66800334228539E-16,-2.));
#799=CARTESIAN_POINT('',(3.,0.,0.));
#800=CARTESIAN_POINT('',(3.,-2.16840434497101E-16,2.));
#801=CARTESIAN_POINT('',(3.,1.66800334228539E-16,-2.));
#802=MECHANICAL_DESIGN_GEOMETRIC_PRESENTATION_REPRESENTATION('',(#24),#803);
#803=(
GEOMETRIC_REPRESENTATION_CONTEXT(3)
GLOBAL_UNCERTAINTY_ASSIGNED_CONTEXT((#804))
GLOBAL_UNIT_ASSIGNED_CONTEXT((#810,#806,#805))
REPRESENTATION_CONTEXT('\X2\5BCC96C696008F6C5B50\X0\',
'TOP_LEVEL_ASSEMBLY_PART')
);
#804=UNCERTAINTY_MEASURE_WITH_UNIT(LENGTH_MEASURE(0.0508),#810,
'DISTANCE_ACCURACY_VALUE','Maximum Tolerance applied to model');
#805=(
NAMED_UNIT(*)
SI_UNIT($,.STERADIAN.)
SOLID_ANGLE_UNIT()
);
#806=(
CONVERSION_BASED_UNIT('DEGREE',#808)
NAMED_UNIT(#807)
PLANE_ANGLE_UNIT()
);
#807=DIMENSIONAL_EXPONENTS(0.,0.,0.,0.,0.,0.,0.);
#808=PLANE_ANGLE_MEASURE_WITH_UNIT(PLANE_ANGLE_MEASURE(0.0174532925),#809);
#809=(
NAMED_UNIT(*)
PLANE_ANGLE_UNIT()
SI_UNIT($,.RADIAN.)
);
#810=(
LENGTH_UNIT()
NAMED_UNIT(*)
SI_UNIT(.MILLI.,.METRE.)
);
ENDSEC;
END-ISO-10303-21;
