# Supplementary material for: A ddPCR platform based on a microfluidic chip with a dual-function flow-focusing structure for sample-to-result DNA quantification analysis
Source: Royal Society of Chemistry journal article supplement (doi:10.1039/d3lc01078c), 2023-12-28
Supplement: d3lc01078c4.xlsx [file d3lc01078c4.xlsx]

## Sheet: DNA in blood
The ctDNA samples are provided by Suzhou Institute of Biomedical Engineer Technology, Chinese Academy of Sciences.
Sample number	Gene	Copy number
1	HER2	245.25
1	CEP17	229.56
2	HER2	248.23
2	CEP17	217.2
3	HER2	188.15
3	CEP17	172.56
4	HER2	166.485
4	CEP17	168.605
5	HER2	151.875
5	CEP17	145.515
6	HER2	150.955
6	CEP17	139.335
7	HER2	300.435
7	CEP17	272.05
8	HER2	295.19
8	CEP17	297.465
9	HER2	263.61
9	CEP17	236.805
10	HER2	278.085
10	CEP17	279.315
11	HER2	135.885
11	CEP17	117.76
12	HER2	130.32
12	CEP17	126.615
13	HER2	835.725
13	CEP17	899.83
14	HER2	766.33
14	CEP17	826.77
15	HER2	196.08
15	CEP17	173.335
16	HER2	166.125
16	CEP17	139.7
17	HER2	318.225
17	CEP17	298.19
18	HER2	334.985
18	CEP17	299.805
19	HER2	121.96
19	CEP17	115.81
20	HER2	105.155
20	CEP17	115.395
21	HER2	377.26
21	CEP17	355.885
22	HER2	350.125
22	CEP17	341.74
23	HER2	272.675
23	CEP17	240.235
24	HER2	263.845
24	CEP17	236.66

## Sheet: Tumor tissue DNA
The tumor tissue DNA samples are provided by Changzhou tumor Hospital.
Sample number	Gene	Copy number
1	HER2	676.63
1	CEP17	799.594
2	HER2	642.484
2	CEP17	787.412
3	HER2	720.42
3	CEP17	897.472
4	HER2	733.708
4	CEP17	920.866
5	HER2	2122.19
5	CEP17	2713.22
6	HER2	2156.54
6	CEP17	2794.56
7	HER2	1237.98
7	CEP17	1423.35
8	HER2	1121.45
8	CEP17	1373.23
9	HER2	1016.19
9	CEP17	1196.78
10	HER2	1094.38
10	CEP17	1277.97
11	HER2	7839.8
11	CEP17	2390.2
12	HER2	7945.17
12	CEP17	2506.17
13	HER2	2207.61
13	CEP17	2961.21
14	HER2	2243.88
14	CEP17	3111.01
15	HER2	5630.28
15	CEP17	987.514
16	HER2	5817.44
16	CEP17	1058.6
17	HER2	1962.9
17	CEP17	1159.23
18	HER2	2207.05
18	CEP17	1293.04
19	HER2	1038.26
19	CEP17	1305.21
20	HER2	1134.43
20	CEP17	1428.49
21	HER2	1347.25
21	CEP17	1566.66
22	HER2	1349.71
22	CEP17	1580.87
23	HER2	1469.77
23	CEP17	1319.48
24	HER2	1241.38
24	CEP17	1115.08
25	HER2	1523.44
25	CEP17	1813.52
26	HER2	1610.79
26	CEP17	1968.49
27	HER2	1505.25
27	CEP17	1762.59
28	HER2	1266.54
28	CEP17	1490.88
29	HER2	6445.6
29	CEP17	1300.83
30	HER2	6200.45
30	CEP17	1255.76
31	HER2	902.084
31	CEP17	1129.83
32	HER2	919.094
32	CEP17	1103.08
33	HER2	679.036
33	CEP17	850.22
34	HER2	665.75
34	CEP17	876.152
35	HER2	1715.06
35	CEP17	2071.87
36	HER2	1703.7
36	CEP17	2037.18
37	HER2	1142.19
37	CEP17	1304.98
38	HER2	1306.76
38	CEP17	1681.37
39	HER2	14873.1
39	CEP17	1664.62
40	HER2	13020.4
40	CEP17	1483.24
41	HER2	565.182
41	CEP17	762.118
42	HER2	525.328
42	CEP17	679.782
43	HER2	847.624
43	CEP17	804.072
44	HER2	768.342
44	CEP17	707.788
45	HER2	997.638
45	CEP17	1272.45
46	HER2	1012.94
46	CEP17	1375.85
47	HER2	2898.58
47	CEP17	695.96
48	HER2	3413.16
48	CEP17	824.424
49	HER2	183.6
49	CEP17	203.518
50	HER2	209.126
50	CEP17	260.09
51	HER2	868.458
51	CEP17	971.42
52	HER2	677.828
52	CEP17	817.322
53	HER2	834.11
53	CEP17	932.216
54	HER2	923.176
54	CEP17	980.716
55	HER2	612.764
55	CEP17	549.08
56	HER2	570.232
56	CEP17	500.912
57	HER2	379.808
57	CEP17	283.386
58	HER2	402.86
58	CEP17	287.734
59	HER2	528.976
59	CEP17	581.324
60	HER2	527.706
60	CEP17	577.414
61	HER2	829.61
61	CEP17	864.182
62	HER2	901.614
62	CEP17	957.676
63	HER2	615.312
63	CEP17	861.908
64	HER2	579.224
64	CEP17	849.684
65	HER2	840.668
65	CEP17	929.468
66	HER2	832.72
66	CEP17	900.538
67	HER2	492.896
67	CEP17	107.39
68	HER2	447.342
68	CEP17	101.478
69	HER2	427.18
69	CEP17	419.872
70	HER2	372.3
70	CEP17	353.762
71	HER2	379.214
71	CEP17	422.144
72	HER2	279.802
72	CEP17	219.712
73	HER2	2050.65
73	CEP17	685.772
74	HER2	1932.89
74	CEP17	674.654
75	HER2	704.02
75	CEP17	732.65
76	HER2	630.024
76	CEP17	518.722
77	HER2	382.076
77	CEP17	282.51
78	HER2	404.954
78	CEP17	328.048
79	HER2	1205.43
79	CEP17	858.336
80	HER2	1213.43
80	CEP17	912.346
81	HER2	394.65
81	CEP17	476.368
82	HER2	374.878
82	CEP17	532.09
83	HER2	1374.06
83	CEP17	1609.5
84	HER2	1371.36
84	CEP17	1546.98
85	HER2	267.562
85	CEP17	284.876
86	HER2	279.572
86	CEP17	305.182
87	HER2	632.334
87	CEP17	636.532
88	HER2	542.372
88	CEP17	541.236
89	HER2	122.788
89	CEP17	103.582
90	HER2	128.324
90	CEP17	112.244
91	HER2	201.202
91	CEP17	215.57
92	HER2	210.156
92	CEP17	196.45
93	HER2	318.018
93	CEP17	332.948
94	HER2	388.78
94	CEP17	373.018
95	HER2	381.614
95	CEP17	409.698
96	HER2	365.296
96	CEP17	450.288
97	HER2	1530.11
97	CEP17	1044.59
98	HER2	1647.52
98	CEP17	1181.48
99	HER2	1147.34
99	CEP17	1145.29
100	HER2	1087.7
100	CEP17	1136.48

## Sheet: DNA in blood(HER2)
Sample number	Gene	Copy number
20	HER2	105.155
19	HER2	121.96
12	HER2	130.32
11	HER2	135.885
6	HER2	150.955
5	HER2	151.875
16	HER2	166.125
4	HER2	166.485
3	HER2	188.15
15	HER2	196.08
1	HER2	245.25
2	HER2	248.23
9	HER2	263.61
24	HER2	263.845
23	HER2	272.675
10	HER2	278.085
8	HER2	295.19
7	HER2	300.435
17	HER2	318.225
18	HER2	334.985
22	HER2	350.125
21	HER2	377.26
14	HER2	766.33
13	HER2	835.725

## Sheet: DNA in blood (CEP17)
Sample number	Gene	Copy number
20	CEP17	115.395
19	CEP17	115.81
11	CEP17	117.76
12	CEP17	126.615
6	CEP17	139.335
16	CEP17	139.7
5	CEP17	145.515
4	CEP17	168.605
3	CEP17	172.56
15	CEP17	173.335
2	CEP17	217.2
1	CEP17	229.56
24	CEP17	236.66
9	CEP17	236.805
23	CEP17	240.235
7	CEP17	272.05
10	CEP17	279.315
8	CEP17	297.465
17	CEP17	298.19
18	CEP17	299.805
22	CEP17	341.74
21	CEP17	355.885
14	CEP17	826.77
13	CEP17	899.83

## Sheet: Tumor tissue DNA (HER2)
Sample number	Gene	Copy number
89	HER2	122.788
90	HER2	128.324
49	HER2	183.6
91	HER2	201.202
50	HER2	209.126
92	HER2	210.156
85	HER2	267.562
86	HER2	279.572
72	HER2	279.802
93	HER2	318.018
96	HER2	365.296
70	HER2	372.3
82	HER2	374.878
71	HER2	379.214
57	HER2	379.808
95	HER2	381.614
77	HER2	382.076
94	HER2	388.78
81	HER2	394.65
58	HER2	402.86
78	HER2	404.954
69	HER2	427.18
68	HER2	447.342
67	HER2	492.896
42	HER2	525.328
60	HER2	527.706
59	HER2	528.976
88	HER2	542.372
41	HER2	565.182
56	HER2	570.232
64	HER2	579.224
55	HER2	612.764
63	HER2	615.312
76	HER2	630.024
87	HER2	632.334
2	HER2	642.484
34	HER2	665.75
1	HER2	676.63
52	HER2	677.828
33	HER2	679.036
75	HER2	704.02
3	HER2	720.42
4	HER2	733.708
44	HER2	768.342
61	HER2	829.61
66	HER2	832.72
53	HER2	834.11
65	HER2	840.668
43	HER2	847.624
51	HER2	868.458
62	HER2	901.614
31	HER2	902.084
32	HER2	919.094
54	HER2	923.176
45	HER2	997.638
46	HER2	1012.94
9	HER2	1016.19
19	HER2	1038.26
100	HER2	1087.7
10	HER2	1094.38
8	HER2	1121.45
20	HER2	1134.43
37	HER2	1142.19
99	HER2	1147.34
79	HER2	1205.43
80	HER2	1213.43
7	HER2	1237.98
24	HER2	1241.38
28	HER2	1266.54
38	HER2	1306.76
21	HER2	1347.25
22	HER2	1349.71
84	HER2	1371.36
83	HER2	1374.06
23	HER2	1469.77
27	HER2	1505.25
25	HER2	1523.44
97	HER2	1530.11
26	HER2	1610.79
98	HER2	1647.52
36	HER2	1703.7
35	HER2	1715.06
74	HER2	1932.89
17	HER2	1962.9
73	HER2	2050.65
5	HER2	2122.19
6	HER2	2156.54
18	HER2	2207.05
13	HER2	2207.61
14	HER2	2243.88
47	HER2	2898.58
48	HER2	3413.16
15	HER2	5630.28
16	HER2	5817.44
30	HER2	6200.45
29	HER2	6445.6
11	HER2	7839.8
12	HER2	7945.17
40	HER2	13020.4
39	HER2	14873.1

## Sheet: Tumor tissue DNA (CEP17)
Sample number	Gene	Copy number
68	CEP17	101.478
89	CEP17	103.582
67	CEP17	107.39
90	CEP17	112.244
92	CEP17	196.45
49	CEP17	203.518
91	CEP17	215.57
72	CEP17	219.712
50	CEP17	260.09
77	CEP17	282.51
57	CEP17	283.386
85	CEP17	284.876
58	CEP17	287.734
86	CEP17	305.182
78	CEP17	328.048
93	CEP17	332.948
70	CEP17	353.762
94	CEP17	373.018
95	CEP17	409.698
69	CEP17	419.872
71	CEP17	422.144
96	CEP17	450.288
81	CEP17	476.368
56	CEP17	500.912
76	CEP17	518.722
82	CEP17	532.09
88	CEP17	541.236
55	CEP17	549.08
60	CEP17	577.414
59	CEP17	581.324
87	CEP17	636.532
74	CEP17	674.654
42	CEP17	679.782
73	CEP17	685.772
47	CEP17	695.96
44	CEP17	707.788
75	CEP17	732.65
41	CEP17	762.118
2	CEP17	787.412
1	CEP17	799.594
43	CEP17	804.072
52	CEP17	817.322
48	CEP17	824.424
64	CEP17	849.684
33	CEP17	850.22
79	CEP17	858.336
63	CEP17	861.908
61	CEP17	864.182
34	CEP17	876.152
3	CEP17	897.472
66	CEP17	900.538
80	CEP17	912.346
4	CEP17	920.866
65	CEP17	929.468
53	CEP17	932.216
62	CEP17	957.676
51	CEP17	971.42
54	CEP17	980.716
15	CEP17	987.514
97	CEP17	1044.59
16	CEP17	1058.6
32	CEP17	1103.08
24	CEP17	1115.08
31	CEP17	1129.83
100	CEP17	1136.48
99	CEP17	1145.29
17	CEP17	1159.23
98	CEP17	1181.48
9	CEP17	1196.78
30	CEP17	1255.76
45	CEP17	1272.45
10	CEP17	1277.97
18	CEP17	1293.04
29	CEP17	1300.83
37	CEP17	1304.98
19	CEP17	1305.21
23	CEP17	1319.48
8	CEP17	1373.23
46	CEP17	1375.85
7	CEP17	1423.35
20	CEP17	1428.49
40	CEP17	1483.24
28	CEP17	1490.88
84	CEP17	1546.98
21	CEP17	1566.66
22	CEP17	1580.87
83	CEP17	1609.5
39	CEP17	1664.62
38	CEP17	1681.37
27	CEP17	1762.59
25	CEP17	1813.52
26	CEP17	1968.49
36	CEP17	2037.18
35	CEP17	2071.87
11	CEP17	2390.2
12	CEP17	2506.17
5	CEP17	2713.22
6	CEP17	2794.56
13	CEP17	2961.21
14	CEP17	3111.01
